# Supplementary material
Source: PubMed Central journal article supplement (PMC6529945)
Supplement: NIHMS1028628-supplement-Supplemental_Material.pdf [file NIHMS1028628-supplement-Supplemental_Material.pdf]

## Supplemental Material

The following measures were administered:

*Anticipated Duration and Intensity Scale* (Sayette et al., 2005)

*Aroma Questionnaire* (Herz & Cupchik, 1995)

*Attention to and Importance of Odors* scale (Herz, 2004)

*Balanced Inventory of Desirable Responding-6* (Paulhus, 1991)

*Behavioral Disengagement in Response to Stress* (Carver, Scheier & Weintraub, 1989)

*Brief Wisconsin Inventory of Smoking Dependence Motives* (Smith et al., 2010)

*Contemplation Ladder* (Biener & Abrams, 1991)

*Experiences in Close Relationships* (Feeney & Thrush, 2010)

*Mindful Attention Awareness Scale* (Brown & Ryan, 2003)

*NEO Five-factor Inventory (NEO-FFI)* Costa & McCrae, 1992)

*Nicotine Dependence Syndrome Scale* (Shiffman et al., 2004)

*Operation–Word–Span task* (Turner & Engle, 1989)

*Revised Fagerström Test for Nicotine Dependence* (Heatherton et al., 1991)

*Schutte Self Report Emotional Intelligence Test* (Schutte et al., 1998)

*Sentence Completion for Events from the Past Test* (Raes et al., 2007)

*Smoking Abstinence Questionnaire* (Hendricks et al., 2011)

*Smoking Choice Task* (Sayette et al., 2001)

*Smoking Consequences Questionnaire-Brief (SCQ-B)* (Sayette et al., 2005)

*Smoking History Questionnaire* (Sayette et al., 2001)

*Smoking-specific Felt Attitudinal Ambivalence Scale* (Lipkus et al., 2001)

*Sniffin' Sticks Odor Threshold Test* (Hummel et al., 2007)

## References

- Beiner, L. & Abrams, D.B. (1991). The Contemplation Ladder: Validation of a measure of readiness to consider smoking motivation. *Health Psychology, 10*, 360-365.
- Brown, K.W. & Ryan, R.W. (2003). The Benefits of being present: Mindfulness and its role in psychological well-being. *Journal of Personality and Social Psychology, 84*, 822-848.
- Carver, C. S., Scheier, M. F., & Weintraub, J. K. (1989). Assessing coping strategies: A theoretically based approach. *Journal of Personality and Social Psychology, 56*, 267-283.
- Costa, P. T., Jr., & McCrae, R. R. (1992). *Revised NEO Personality Inventory (NEO-PI-R) and NEO Five-Factor Inventory (NEO-FFI): Professional manual*. Odessa, FL: Psychological Assessment Resources.
- Feeney, B. C., & Thrush, R. L. (2010). Relationship influences on exploration in adulthood: The characteristics and function of a secure base. *Journal of Personality and Social Psychology, 98*, 57-76.
- Heatherton, T.F. & Polivy, J. (1991). Development and validation of a scale for measuring state self-esteem. *Journal of Personality and Social Psychology, 60*, 895-910.
- Hendricks, P.S., Wood, S.B., Baker, M.R., Delucchi, K.L., & Hall, S.M. (2011). The smoking abstinence Questionnaire: Measurement of smokers' abstinence-related expectancies. *Addiction, 106*, 716-728.
- Herz, R. S. (2004). A naturalistic analysis of autobiographical memories triggered by olfactory visual and auditory stimuli. *Chemical Senses, 29*, 217-224.
- Herz, R. S., & Cupchik, G. C. (1995). The emotional distinctiveness of odor-evoked memories. *Chemical Senses, 20*, 517-528.

- Hummel, T., Kobal, G., Gudziol, H., & Mackay-Sim, A. (2007). Normative data for the “Sniffin’ Sticks” including tests of odor identification, odor discrimination, and olfactory thresholds: an upgrade based on a group of more than 3,000 subjects. *European Archives of Otorhinolaryngology*, *264*, 237-243.
- Lipkus, I.M., Green, J.D., Feaganes, J.R., Sedikides, C., (2001). The relationship between attitudinal ambivalence and desire to quit smoking among college smokers. *Journal of Applied Social Psychology*, *31*, 113-133.
- Paulhus, D. L. (1991). Measurement and control of response bias. In J. Robinson, P. Shaver, & L. Wrightsman (Eds.), *Measures of personality and social psychological attitudes*, Vol. 1. (pp. 17-59). San Diego, CA: Academic Press.
- Raes, F., Hermans, D., Williams, J. M., & Eelen, P. (2007). A sentence completion procedure as an alternative to the Autobiographical Memory Test for assessing overgeneral memory in non-clinical populations. *Memory*, *15*, 495-507.
- Sayette, M.A., Loewenstein, G., Kirchner, T.R., & Travis, T. (2005). Effects of smoking urge on temporal cognition. *Psychology of Addictive Behaviors*, *19*, 88-93.
- Sayette, M.A., Martin, C.S., Wertz, J.M, Shiffman, S., & Perrott, M.A. (2001). A Multidimensional analysis of cue-elicited craving in heavy smokers and tobacco chippers. *Addiction*, *96*, 1419-1432.
- Schutte, N.S., Malouff, J.M., Hall, L.E., Haggerty, D.J., Cooper, J.T. Golden, C.J, et al., (1998). Development and validation of a measure of emotional intelligence. *Personality and Individual Differences*, *25*, 167-177.

Shiffman, S., Waters, A.J., & Hickcox, M. (2004). The Nicotine Dependence Syndrome Scale: A multidimensional measure of nicotine dependence. *Nicotine & Tobacco Research*, 6(2), 327-348.

Smith, S.S., Piper, M.E., Bolt, D.M., Fiore, M.C., Wetter, D.W., Cinciripini, P.M, et al. (2010). Development of the Brief Wisconsin Inventory of Smoking Dependence Motives. *Nicotine and Tobacco Research*, 12, 489-499.

Turner, M.L & Engle, R.W. (1989). Is working memory capacity task dependent? *Journal of Memory and Language*, 28, 127-154.
